# Supplementary material for: Photoconversion and chromatographic microfluidic system reveals differential cellular phenotypes of adhesion velocity versus persistence in shear flow
Source: Royal Society of Chemistry journal article supplement (doi:10.1039/c9lc00923j), 2020-01-01

**Figure S1. Photoconvertible LS174T cell line and adhesive chromatography microfluidic characterization.** (A,B) Comparison of (A) average rolling velocity and (B) percent of cells collected in each fraction from a cell pulse of either 250,000 control LS174T cells or Phamret-expressing LS174T cells over  $2.5 \mu\text{g mL}^{-1}$  E-selectin at  $1 \text{ dyn cm}^{-2}$ . (C) Number of interacting cells along the length of the channel during the sorting phase in an E-, P-, or L-selectin functionalized channel. (D) Representative relative frequency distribution of elution time of a cell pulse infused at  $0.5 \text{ dyn cm}^{-2}$ . Inset depicts the mean time at which 95% of the cell pulse has eluted  $\pm$  s.e.m. (E) Percent of cells collected in each fraction after perfusion in an E-, P-, or L-selectin functionalized channel. (F) Viability of cells in each collected Free flow or Adherent fraction. (C-F) Perfusion and separation of a Phamret-expressing LS174T cell pulse of 250,000 cells over  $2.5 \mu\text{g mL}^{-1}$  E-selectin at  $1 \text{ dyn cm}^{-2}$  or  $25 \mu\text{g mL}^{-1}$  L- or P-selectin at  $0.5 \text{ dyn cm}^{-2}$ . (A-E) Each dot or bar represents the mean  $\pm$  s.e.m. of  $n \geq 3$  individually run experiments. Statistical analysis (A,B,F) by paired t-test or (E) one-way ANOVA with post hoc t-test with Bonferroni corrections for multiple comparisons.

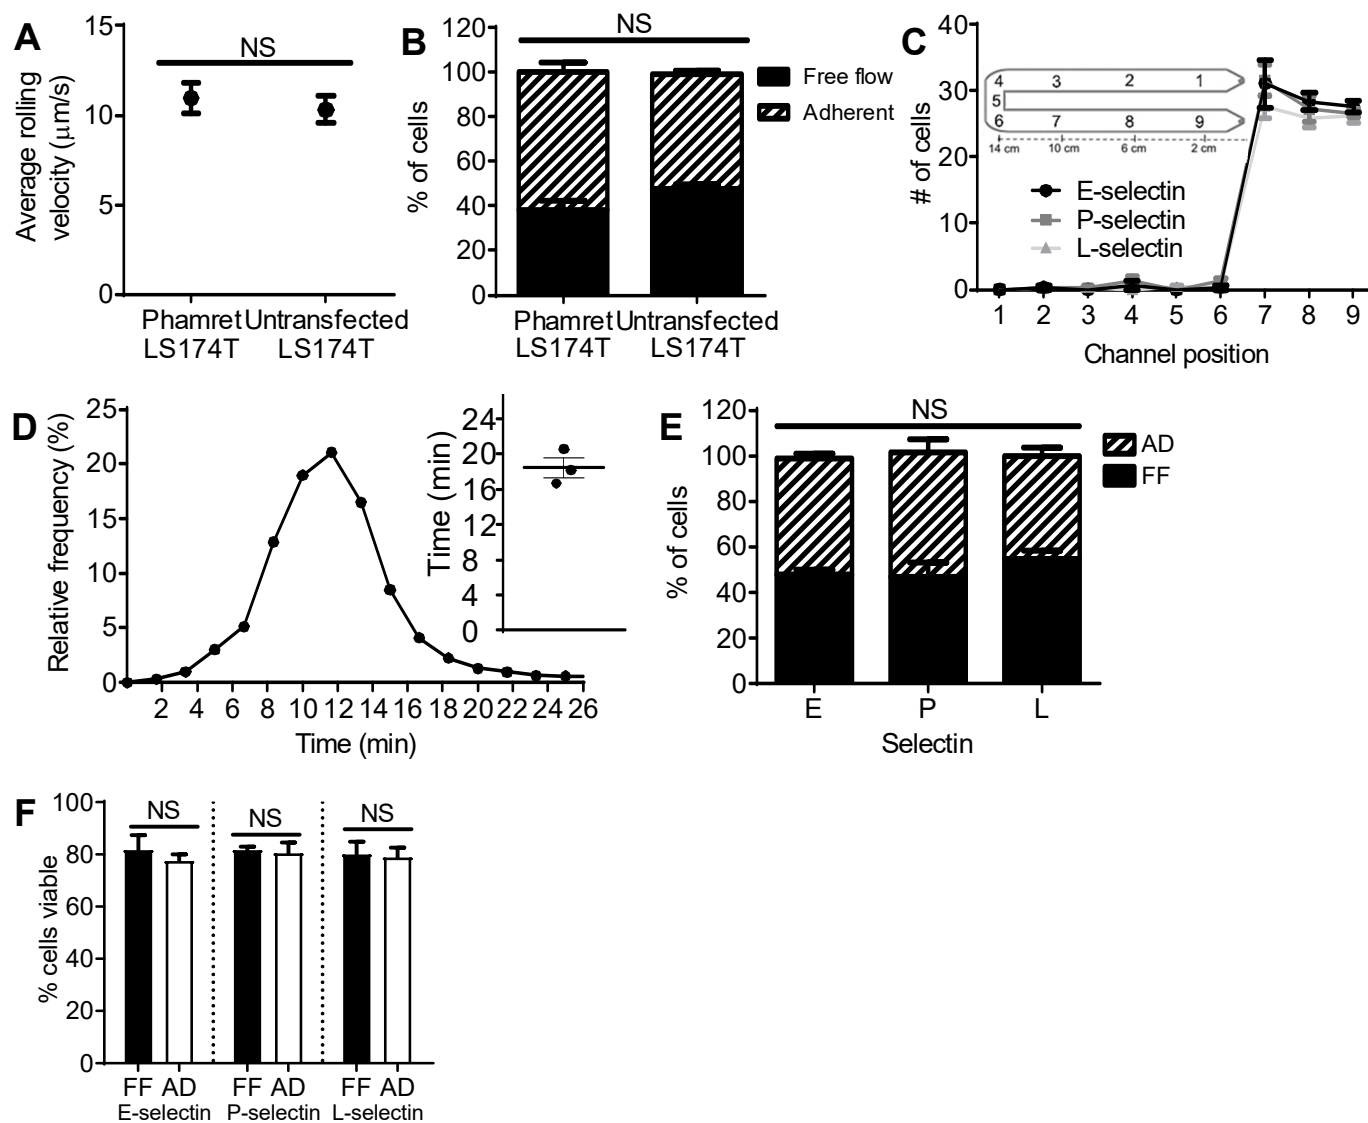

**Figure S2. Elution time determination for collection of multiple AD fractions.** (A) Relative cumulative frequency of elution time of the interacting cells in a perfused cell pulse. Orange, blue, and green lines represent elution of 33%, 50%, and 66% of the interacting cells, respectively. (B,C) Percent of cells in each fraction when either (B) 2 or (C) 3 Adherent fractions are collected. (A-C) Perfusion of 250,000 Phamret-expressing LS174T cells over  $2.5 \mu\text{g mL}^{-1}$  E-selectin at  $1 \text{ dyn cm}^{-2}$ . (B,C) Each bar represents the mean  $\pm$  s.e.m. of  $n \geq 3$  individually run experiments.

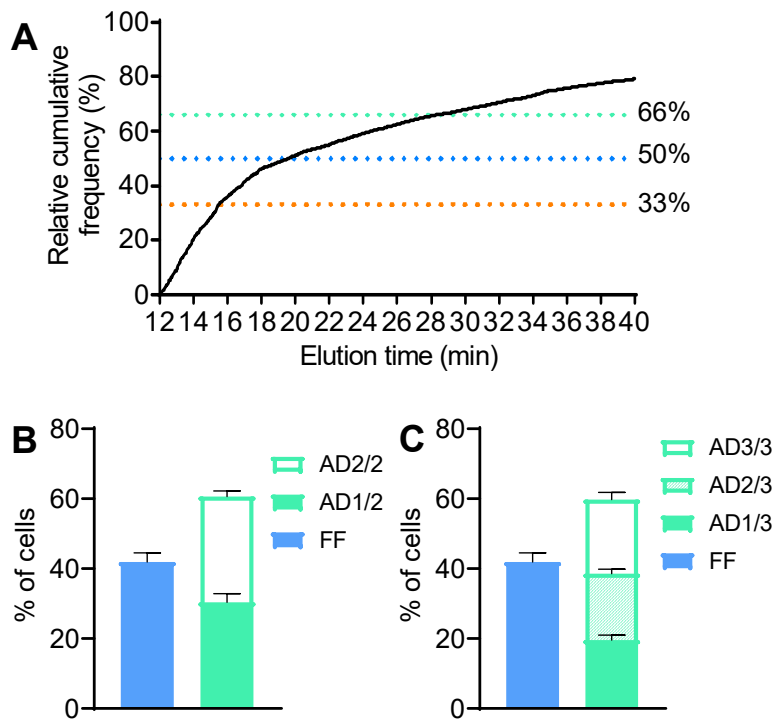

**Figure S3. No correlations between ligand expression and GFP/CFP ratios among PC- cells within any collected cell fraction.** (A-E) The extent of photoconversion (GFP/CFP ratio) of FF PC- cells and (A-C) 2 or (D-E) 3 AD fractions related to the expression of (A,D) sLe<sup>x</sup> reactive HECA452, (B,E) CD44, and (C,F) CEA. (A-F) Binned, flow cytometry data of PC- cells was pooled from independent experiments and plotted with corresponding linear fits;  $C_F$  and  $C_{AD}$  represent the regression slope of the PC- cells in the Adherent and Free flow fractions, respectively. Outlier tests with criteria  $Q = 1$  were conducted on all data sets, and outliers were removed prior to regression and statistical analysis. Perfusion, photoconversion, and separation of a Phamret-expressing LS174T cell pulse of 250,000 cell over  $2.5 \mu\text{g mL}^{-1}$  E-selectin at  $1 \text{ dyn cm}^{-2}$ .

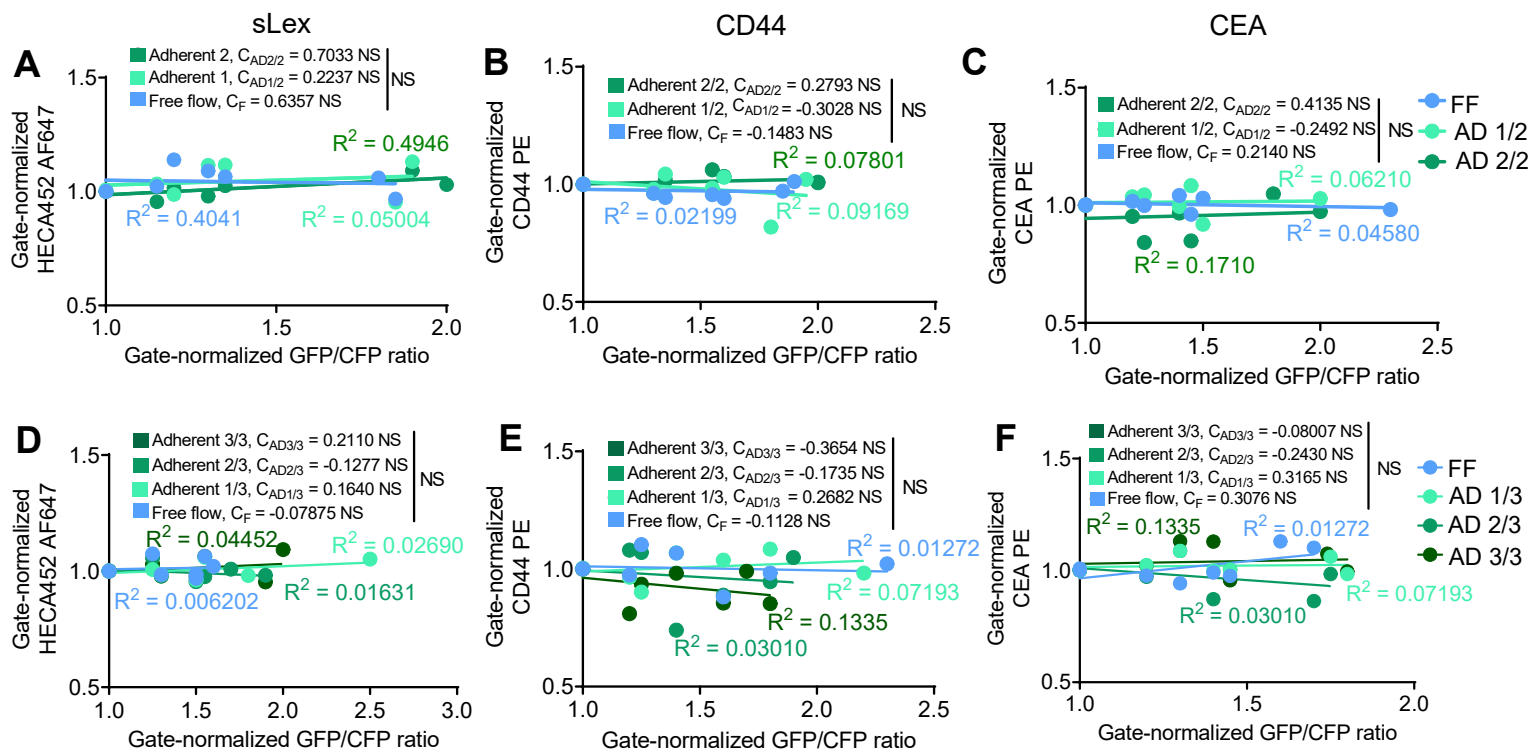

**Figure S4. Effects of pre-photoconversion on cells pre and post perfusion.** (A) Percent of viable Phamret-expressing LS174T cells after exposure to the 405 nm laser for different lengths of static pre-photoconversion time. Gray line represents 75% cell viability, black line represents 50% cell viability. (B,C) Percent of cells viable (B) 4 or (C) 8 min of pre-photoconversion. FF denotes Free flow, AD denotes Adherent. PC denotes photoconversion. (D,E) Percent of cells collected in each fraction after either (D) 4 or (E) 8 minutes of static photoconversion, followed by perfusion without photoconversion and fractionation. (A-E) Pre-photoconversion and perfusion of a Phamret-expressing LS174T cell pulse of 250,000 cell over  $2.5 \mu\text{g mL}^{-1}$  E-selectin at  $1 \text{ dyn cm}^{-2}$ . (A-E) Each bar represents the mean  $\pm$  s.e.m. of  $n \geq 3$  individually run experiments. (B,C) \*\*  $p < 0.01$ , \*\*\*  $p < 0.001$ , \*\*\*\*  $p < 0.0001$  by one-way ANOVA with post hoc t-test with Bonferroni corrections for multiple comparisons. (D,E) Two sample t-test comparing percent of cells in each fraction compared to percent of cells in each fraction when cells are not pre-photoconverted (Figure S2B). NS denotes no significance.

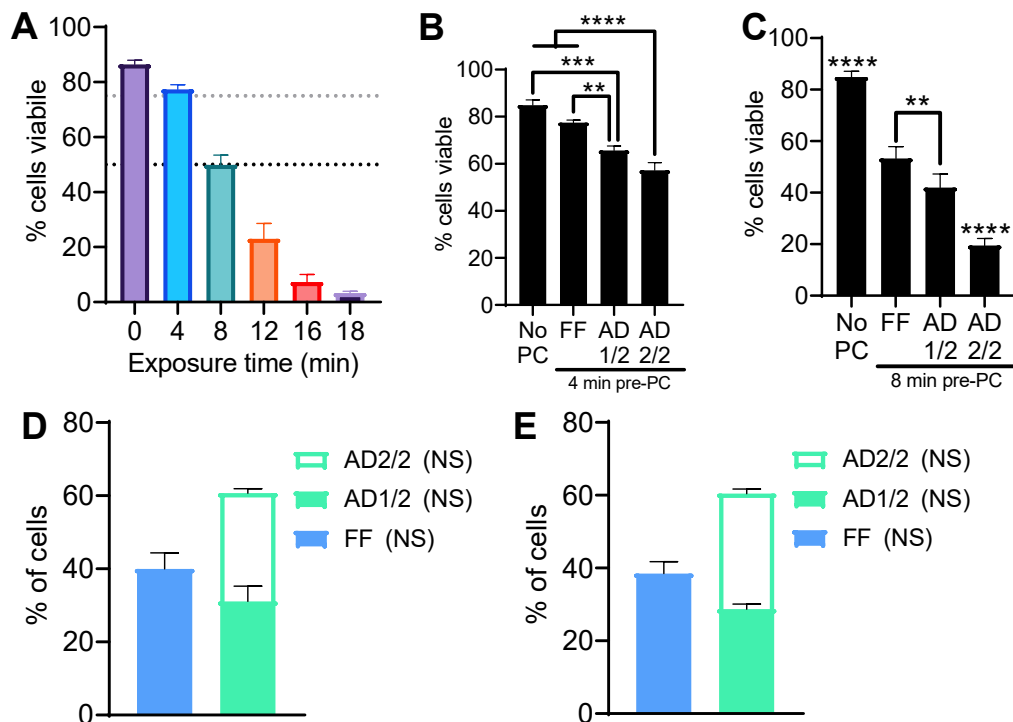

**Figure S5. No correlation between selectin ligand expression and GFP/CFP ratios among cells that remain unphotoconverted.** The extent of photoconversion (GFP/CFP ratio) of PC- cells within FF and AD fractions related to the expression of (A) sLe<sup>x</sup> (HECA452), (B) CD44, and (C) CEA sorted over E-, P-, or L-selectin. (A-C) Binned, flow cytometry data of PC- cells was pooled from independent experiments and plotted with corresponding linear fits;  $C_{AD}$  and  $C_F$  represent the regression slope of the PC- cells in the AD and FF fractions, respectively. Outlier tests with criteria  $Q = 1$  were conducted on all data sets, and outliers were removed prior to regression and statistical analysis. Perfusion, photoconversion, and separation of a Phamret-expressing LS174T cell pulse of 250,000 cell over 2.5  $\mu\text{g mL}^{-1}$  E-selectin at 1  $\text{dyn cm}^{-2}$  or 25  $\mu\text{g mL}^{-1}$  P- or L-selectin at 0.5  $\text{dyn cm}^{-2}$ .

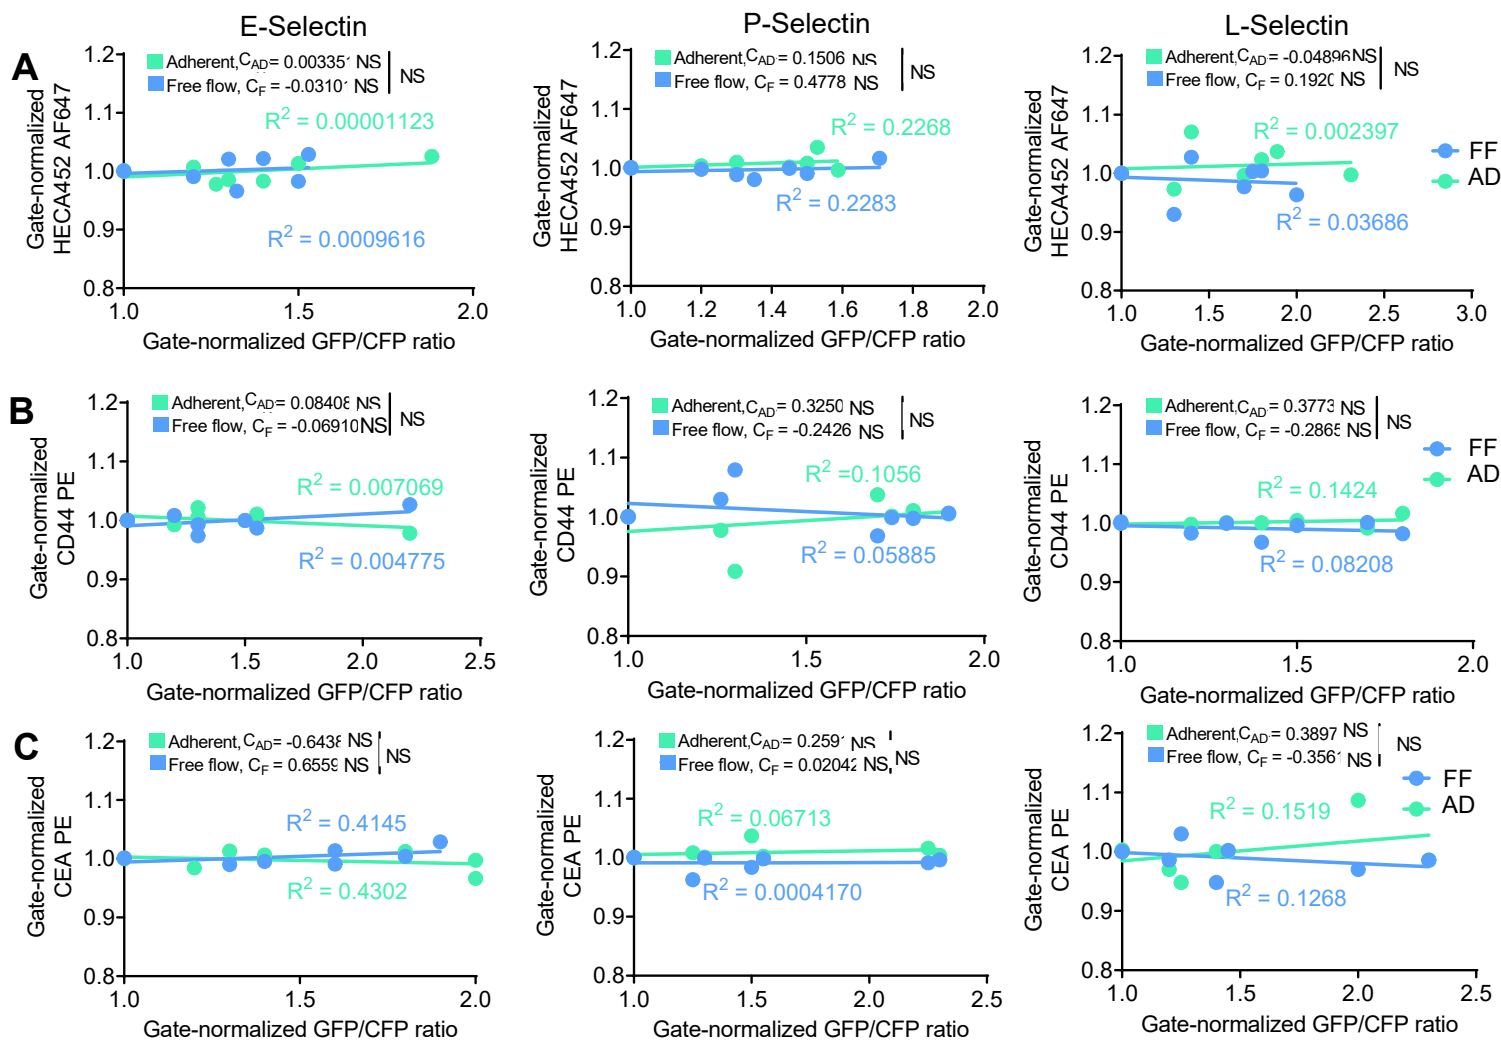

**Figure S6. Neuraminidase treatment effects on cell adhesion in flow to P- and L-selectin.** (A,C) Percent of cells collected in the FF and AD fractions. (B,D) Percent of cells photoconverted in the AD fraction normalized to the FF fraction after perfusion of a cell pulse of 250,000 Phamret-expressing LS174T cells over  $25 \mu\text{g mL}^{-1}$  (A,B) P- or (C,D) L-selectin at  $0.5 \text{ dyn cm}^{-2}$ . FF denotes Each dot or bar represents the mean  $\pm$  s.e.m. of  $n \geq 3$  individually run experiments. \*\*\*\*  $p < 0.0001$  by (A,C) one-way ANOVA with post hoc t-test with Bonferroni corrections for multiple comparisons or (B,D) one sample t-test with  $h_0 = 1$ ; dashed line at  $y = 1$ .

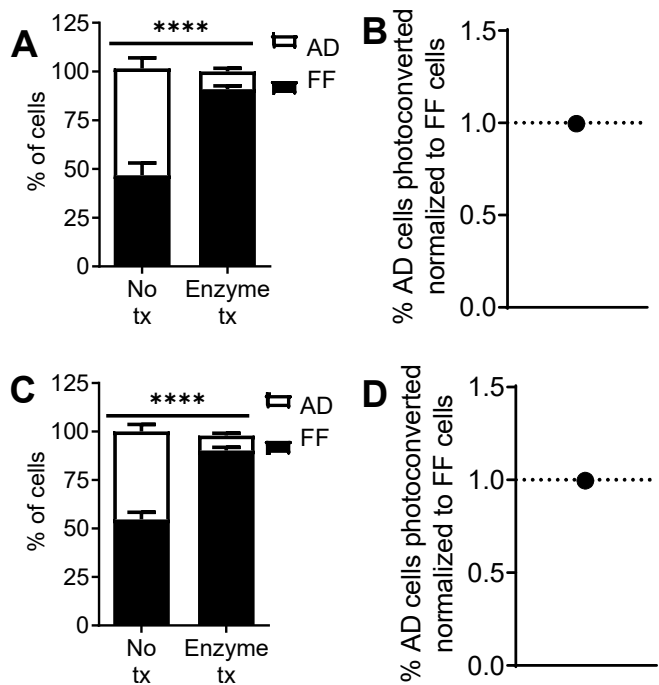

**Figure S7. Comparison of interpolated standard curves.** (A) Overlay of photoconversion standard curves created either by statically photoconverting 250,000 Phamret-expressing LS174T cells for various amounts of time (gray line) or perfusing a cell pulse of 250,000 Phamret-expressing LS174T cells in an unfunctionalized channel at various flow rates (black line). (B) Static standard curve (orange) and perfusion standard curve (black) from (A) overlaid with a perfusion standard curve from a population of Phamret-expressing LS174T cells (teal) thawed at a different time than the cells used to create the standard curves from (A).

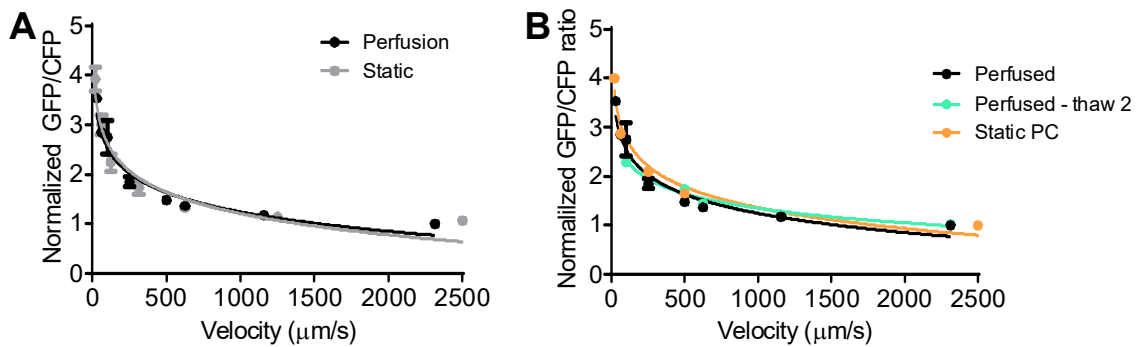

**Figure S8. Verification of anti-IgG functionalization after perfusion.** (A) Standard curve of mean fluorescence intensity (MFI) of FITC labeled anti-IgG at different concentrations with MFI of perfusion media collected after either functionalization and perfusion with 2.5  $\mu\text{g/mL}$  anti-IgG at 1  $\text{dyn cm}^{-2}$  for 28 minutes (purple circle) or 25  $\mu\text{g/mL}$  anti-IgG at 0.5  $\text{dyn cm}^{-2}$  for 20 minutes (orange square).

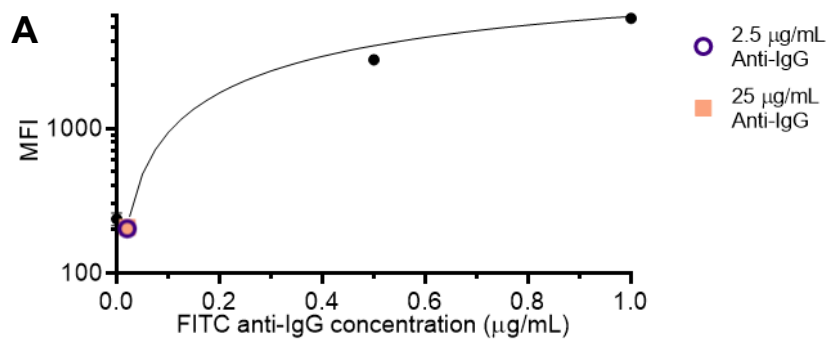

Supplement: c9lc00923j1.pdf [file c9lc00923j1.pdf]
